# Supplementary material for: Differences in Cell Division Rates Drive the Evolution of Terminal Differentiation in Microbes
Source: PubMed Central journal article supplement (PMC3325182; doi:10.1371/journal.pcbi.1002468), 2012-04-12
Supplement: pcbi.1002468.s001.pdf [file pcbi.1002468.s001.pdf]

K=4

K=12

K=24

**A**  
Broken chain  
topology  
(C=0)

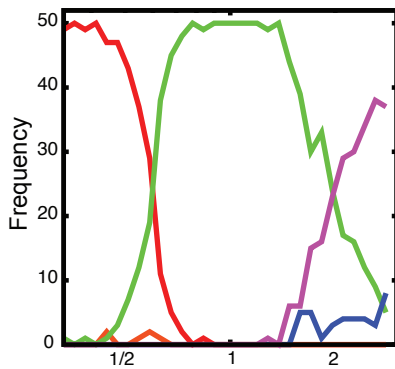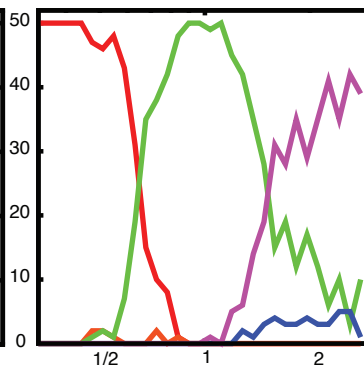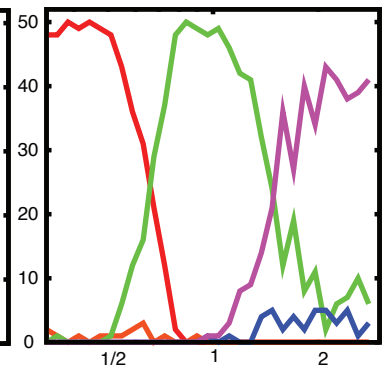

**B**  
Broken chain  
topology  
(C=0.2)

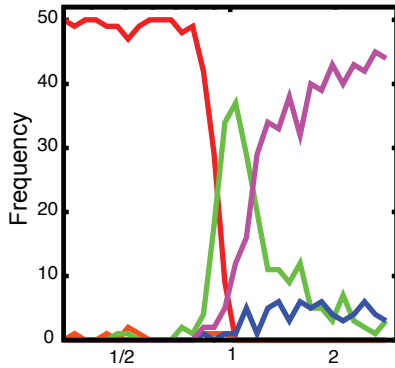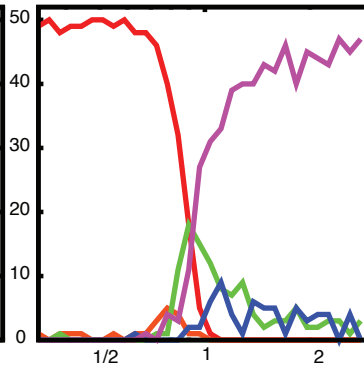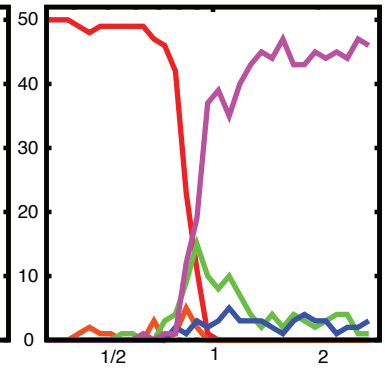

**C**  
Connected  
topology  
(C=0)

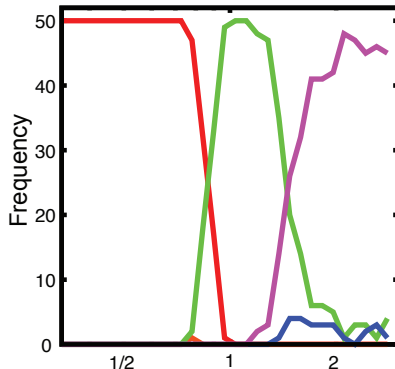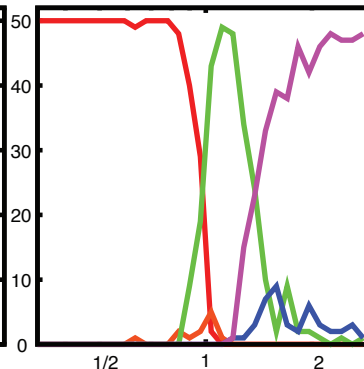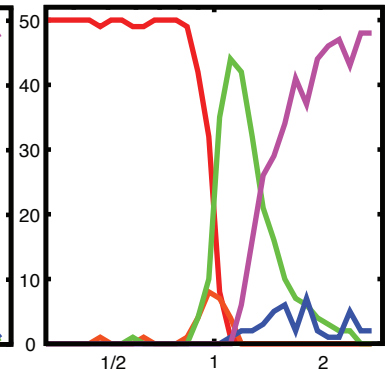

**D**  
Connected  
topology  
(C=0.2)

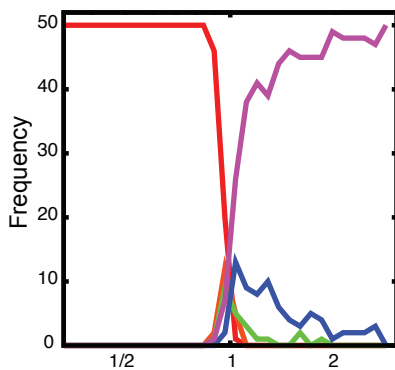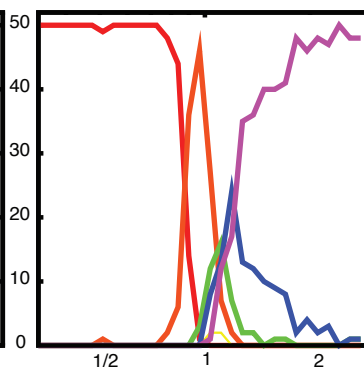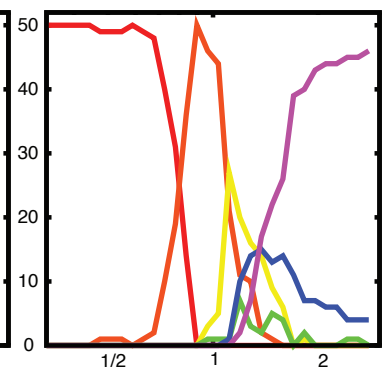Relative division rate ( $\alpha$ )Relative division rate ( $\alpha$ )Relative division rate ( $\alpha$ )

— I. Terminal differentiation P germline

— IV. Symbiosis P and N germline

— II. Terminal differentiation P germline (with somatic division)

— V. Terminal differentiation N germline (with somatic division)

— III. Reversible differentiation P and N germline

— VI. Terminal differentiation N germline
