# Supplementary material for: Differences in Cell Division Rates Drive the Evolution of Terminal Differentiation in Microbes
Source: PubMed Central journal article supplement (PMC3325182; doi:10.1371/journal.pcbi.1002468), 2012-04-12

Relative division rate ( $\alpha$ )

2

1

1/2

0

5

10

15

20

25

Interaction range (K)

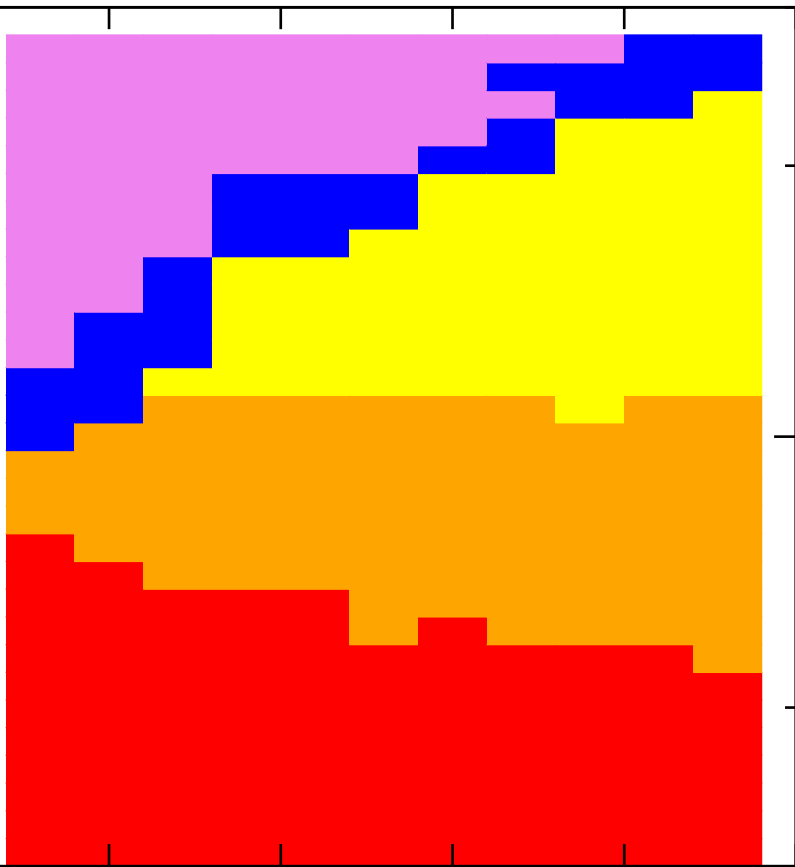

Supplement: pcbi.1002468.s002.pdf [file pcbi.1002468.s002.pdf]
