# Supplementary material for: Differences in Cell Division Rates Drive the Evolution of Terminal Differentiation in Microbes
Source: PubMed Central journal article supplement (PMC3325182; doi:10.1371/journal.pcbi.1002468), 2012-04-12

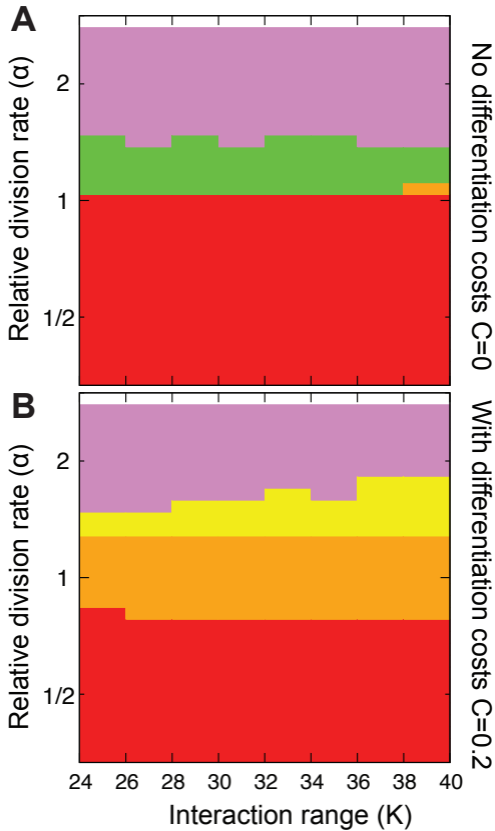

Supplement: pcbi.1002468.s003.pdf [file pcbi.1002468.s003.pdf]
